# Supplementary material for: Metabolomics of Rice Bran Differentially Impacted by Fermentation With Six Probiotics Demonstrates Key Nutrient Changes for Enhancing Gut Health
Source: Front Nutr. 2022 Feb 16;8:795334. doi: 10.3389/fnut.2021.795334 (PMC8888422; doi:10.3389/fnut.2021.795334)
Supplement: Supplementary Table 1 — Heat map of statistically significant biochemicals profiled in this study. [file Table_1.xlsx]

## Sheet: Explanation
OrigScale	Values are normalized in terms of raw area counts.
ScaledImpData	Each biochemical in OrigScale is rescaled to set the median equal to 1.
	Then, missing values are imputed with the minimum.
Pathway Heat Map	This is the heat map associated with the statistical analysis of the data.
	Indicates ratios, p- and q-values for each comparison.
	0.55	Green: indicates significant difference (p≤0.05) between the groups shown, metabolite ratio of < 1.00
	0.76	Light Green: narrowly missed statistical cutoff for significance 0.05<p<0.10, metabolite ratio of < 1.00
	1.71	Red: indicates significant difference (p≤0.05) between the groups shown; metabolite ratio of ≥ 1.00
	1.32	Light Red: narrowly missed statistical cutoff for significance 0.05<p<0.10, metabolite ratio of ≥ 1.00
	1.2	Non-colored text and cell: mean values are not significantly different for that comparison
		Blue: indicates significant (p≤0.05) ANOVA effect.
		Light Blue: indicates 0.05<p<0.10 ANOVA effect
Box Plots - Alpha	Box plots are provided for each biochemical detected, sorted alphabetically by biochemical name.
Box Plots - Pathway	Box plots are provided for each biochemical detected, sorted by biochemical pathway.
Biochemical Name*	Indicates compounds that have not been officially confirmed based on a standard, but we are confident in its identity.
Biochemical Name**	Indicates a compound for which a standard is not available, but we are reasonably confident in its identity or the
	information provided.
Biochemical Name (#) or [#]	Indicates a compound that is a structural isomer of another compound in the Metabolon spectral library.
	For example, a steroid that may be sulfated at one of several positions that are indistinguishable by the mass
	spectrometry data or a diacylglycerol for which more than one stereospecific molecule exists.

## Sheet: Pathway Heat Map
1 and 2-step probiotic-fermented rice bran
		Fold of Change
		ANOVA Contrasts
		One Step (Bacteria only)					Two Step (Yeast + bacteria)
		B. lo	E. co	L. fe	L. pa	L. rh	S. bo	B. lo	E. co	L. fe	L. pa	L. rh
Sub Pathway	Biochemical Name	None	None	None	None	None	None	None	None	None	None	None
Glycine, Serine and Threonine Metabolism	glycine	0.62	1.31	1.33	3.97	2.62	1.47	0.4	0.48	0.5	1.02	0.63
	N-acetylglycine	1.12	14.21	13.91	5.06	3.12	0.94	0.53	0.69	0.89	0.99	1.05
	dimethylglycine	0.77	0.8	0.88	0.93	0.97	0.74	0.85	0.92	0.98	0.9	0.92
	betaine	2.33	1.43	0.99	0.92	0.95	0.82	0.94	0.91	0.97	1.02	0.93
	serine	0.59	0.17	0.16	1	0.75	0.8	0.36	0.37	0.36	0.67	0.47
	N-acetylserine	2.21	13.46	24.4	10.19	5.28	0.86	0.85	0.87	1.29	2.48	1.41
	2-methylserine	0.44	0.98	1.11	1.14	0.86	0.75	0.65	0.74	1.11	1.24	0.86
	threonine	1.11	0.19	0.15	1.48	0.63	0.94	0.45	0.49	0.5	1.31	0.78
	N-acetylthreonine	2.3	7.96	9.67	6.7	7.03	0.77	0.9	1.12	1.35	2.87	2.59
	allo-threonine	1.95	4.16	9.08	4.4	1.26	4.39	7.5	14.98	12.02	17.2	12.68
	homoserine	0.55	0.96	1	1.17	1.17	0.83	0.67	0.82	0.78	0.94	0.85
	O-acetylhomoserine	5.31	4.16	2.94	3.02	1.79	2.17	10.56	14.93	12.52	11.98	12.62
Alanine and Aspartate Metabolism	alanine	0.5	1.04	1.11	1.34	1.13	0.75	0.26	0.25	0.29	0.58	0.33
	N-acetylalanine	1.43	1.47	1.32	1.22	1.48	0.72	2.03	2.01	2.08	4.1	3.2
	N-methylalanine	14.21	0.98	1.55	1.67	0.98	1.66	37.6	48.14	51.47	76.01	137.07
	N,N-dimethylalanine	1.18	1.06	0.95	1.03	0.97	0.92	0.89	0.97	0.95	0.95	0.88
	aspartate	0.22	0.28	0.19	0.81	0.86	0.69	0.08	0.15	0.08	0.34	0.23
	N-acetylaspartate (NAA)	4.71	4.05	3.34	1.82	3.35	1.19	1.24	1	1.42	1.47	1.57
	asparagine	0.01	0.12	0.81	0.81	0.75	0.61	0.08	0.06	0.1	0.16	0.08
	N-acetylasparagine	0.22	1.96	2.16	1.22	1.24	0.82	0.54	0.85	0.81	0.67	0.85
Glutamate Metabolism	glutamate	0.49	0.62	0.76	0.97	1.04	0.84	0.19	0.2	0.18	0.3	0.25
	glutamine	1.39	0.73	4.01	6.06	1.79	1.78	1.95	1.62	2.12	4.39	2.56
	alpha-ketoglutaramate*	1.38	1.77	1.87	1.56	1.26	1.26	0.76	0.89	0.81	1.63	0.85
	N-acetylglutamate	0.69	1.5	1.46	0.86	1.31	0.79	0.99	1.08	1.22	1.05	1.05
	N-acetylglutamine	1.04	15.91	18.28	5.22	1.98	0.76	1.81	3.88	4.34	3.9	2.71
	4-hydroxyglutamate	1.7	0.9	1.22	0.91	0.97	1.14	0.27	0.63	0.52	0.9	0.46
	pyroglutamine*	0.7	0.74	0.85	0.93	0.88	0.67	0.85	0.77	0.83	0.84	0.81
	beta-citrylglutamate	5.17	1.41	1.63	1.32	1.8	2.7	1.73	1.55	1.24	1.64	1.46
	gamma-aminobutyrate (GABA)	0.26	1.21	0.88	0.93	0.93	0.86	0.13	0.18	0.12	0.25	0.19
	carboxyethyl-GABA	0.84	0.84	0.89	0.92	0.91	0.78	0.81	0.82	0.81	0.87	0.78
	citramalate	4.59	4.46	0.65	0.79	0.92	1.4	8.36	10.41	11.07	6.78	10.91
Histidine Metabolism	histidine	1.05	0.43	0.58	0.84	0.85	0.42	0.21	0.21	0.21	0.4	0.31
	3-methylhistidine	0.66	0.61	0.68	0.76	0.74	0.56	0.28	0.39	0.36	0.4	0.35
	N-acetylhistidine	1.27	1.05	1.11	0.81	0.88	0.77	0.95	0.96	0.92	1.05	0.97
	imidazole lactate	3.71	6.81	5.38	2.81	1.84	0.94	11.22	5.21	3.19	10.83	7.88
	1-methyl-5-imidazoleacetate	0.99	0.9	0.91	0.87	0.88	0.79	1.37	1.23	1.31	1.54	1.17
	4-imidazoleacetate	1.09	0.84	0.9	0.87	0.89	0.81	1.27	1.17	1.12	1.33	1.15
Lysine Metabolism	lysine	3.8	0.8	0.99	1.61	1.28	1.15	0.76	0.8	0.8	1.36	1.05
	N2-acetyllysine	1.82	0.95	1.28	1.07	1.62	0.79	0.56	0.66	0.64	0.93	0.87
	N6-acetyllysine	3.35	1.23	1.66	1.2	0.92	0.64	1.05	0.47	0.53	1.1	1.03
	N6-methyllysine	8.48	1.86	1.82	2.98	2.12	1.46	4.81	3.03	3.75	6.28	4.05
	N6,N6-dimethyllysine	2.84	1.06	1.09	1.29	1	1	1.64	1.43	1.5	1.81	1.65
	N6,N6,N6-trimethyllysine	1.31	0.86	0.88	1	0.97	0.78	0.82	0.81	0.83	1	0.82
	fructosyllysine	2.46	0.94	0.85	0.85	0.83	0.98	0.91	0.75	0.77	1.08	0.83
	saccharopine	1.09	0.78	0.81	0.8	0.87	1.53	4.65	1.6	2.41	3.25	2.27
	2-aminoadipate	3.08	1.01	0.83	0.52	0.61	1.06	0.35	0.38	0.29	0.35	0.33
	pipecolate	0.91	0.89	0.89	1.1	0.89	0.75	0.86	0.82	0.89	1.27	0.81
	6-oxopiperidine-2-carboxylate	0.97	0.86	0.92	0.94	0.91	0.94	0.85	0.82	0.94	1.09	0.84
	N,N-dimethyl-5-aminovalerate	0.98	1	1	0.97	1.04	0.86	0.97	0.95	0.99	1	1.02
	N,N,N-trimethyl-5-aminovalerate	0.95	0.84	0.89	0.91	0.93	0.78	0.85	1.01	0.82	0.96	0.92
Phenylalanine Metabolism	phenylalanine	4.37	0.3	0.24	0.26	0.3	0.9	0.64	0.74	0.69	1.81	1.01
	N-acetylphenylalanine	1.22	0.95	0.99	0.89	1.07	0.73	1.54	1.92	2.75	2.03	1.69
	N-lactoyl phenylalanine	68.61	2.43	2.4	6.81	9.68	1	1	1	1	9.22	3.68
	phenylpyruvate	35.02	2.94	1	1	1	1	1.49	1	1.3	2.06	2.47
	phenyllactate (PLA)	19.32	16.99	19.41	11.47	18.31	1.73	75.27	15.81	42.51	168.92	67.8
	4-hydroxyphenylacetate	1.66	1.15	1	1.35	1.27	1	1.63	1	1.1	2.4	1.31
Tyrosine Metabolism	tyrosine	1.15	0.18	0.14	0.3	0.4	1.03	0.2	0.22	0.18	0.65	0.32
	N-acetyltyrosine	0.9	2.52	2.39	1.26	1.33	0.81	0.94	1.33	1.44	1.44	1.16
	N-lactoyl tyrosine	7.54	1.46	2.55	23.67	16.4	1	1	1	1	1.27	1.1
	tyramine	1.11	1.47	1.37	1.34	1.71	1.11	1.36	1.28	1.2	1.45	1.09
	4-hydroxyphenylpyruvate	1.44	6	2.92	1.76	1.62	0.68	0.76	0.68	1.4	0.68	0.68
	3-(4-hydroxyphenyl)lactate	4.76	16.52	37.87	77.45	46.16	0.99	8.73	2.07	6.31	58.91	19.07
	3-methoxytyrosine	0.33	0.64	0.63	0.89	0.43	0.59	0.3	0.38	0.43	0.5	0.35
	gentisate	8.51	3.9	3.14	3.78	0.75	1.08	2.9	2.9	2.65	4.53	0.8
	N-formylphenylalanine	1	0.92	0.94	0.95	1.14	0.97	1.09	1.05	1.15	1.19	1.23
	beta-tyrosine	0.75	0.96	0.94	0.98	1.03	0.83	0.69	0.74	0.74	0.76	0.75
Tryptophan Metabolism	tryptophan	0.43	0.33	0.46	0.71	0.62	0.65	0.05	0.06	0.05	0.1	0.07
	N-acetyltryptophan	1.18	0.99	1.02	0.83	0.92	0.74	1.26	1.08	1.14	0.18	0.88
	kynurenate	2.55	1.25	1.13	1.1	1.26	1.01	6.12	4.98	5.52	6.12	5.47
	xanthurenate	1.3	0.65	0.79	0.91	1.08	0.94	7.55	4.34	5.7	7.36	3.63
	serotonin	0.43	0.88	1.06	0.62	0.09	0.49	0.28	0.11	0.14	0.1	0.09
	tryptamine	1.46	0.93	0.86	0.96	0.77	0.53	0.57	0.46	0.49	0.55	0.43
	indolelactate	2.28	14.79	62.43	34	34.17	0.57	1.06	0.41	0.5	9.07	3.25
	indoleacetate	0.96	2.01	1.61	1.08	0.76	0.83	1.19	1.1	1.13	1.35	0.79
	indole-3-carboxylate	1.68	1.84	1.19	0.99	1.15	0.9	1.31	1.13	1.14	1.38	1.2
Leucine, Isoleucine and Valine Metabolism	leucine	5.28	0.41	0.18	0.33	0.52	1.06	0.76	0.95	0.92	1.86	1.29
	N-acetylleucine	1.17	0.88	0.89	1.04	1.17	0.72	1.27	1.9	1.75	1.44	1.62
	N-succinyl-leucine	0.68	0.69	0.55	0.44	0.8	0.66	1.13	1.01	1.24	2.24	1.42
	N-lactoyl leucine	520.36	21.92	13.96	175.89	205.73	1	1	1	1	57.31	33.59
	4-methyl-2-oxopentanoate	9.94	3.37	1	1.04	1.7	1	1	1	1	1	1
	alpha-hydroxyisocaproate	21.88	5.43	2.96	28.53	27.36	1.42	24.54	7.64	7.28	53.87	24.19
	isovalerylglycine	6.68	1	1.31	1.47	0.74	0.99	1.3	1.24	1.81	1.2	1.62
	beta-hydroxyisovalerate	1.67	1.31	0.49	0.49	0.49	0.63	0.49	0.74	0.75	0.49	0.78
	3-methylglutaconate	0.86	0.91	0.79	0.9	0.81	0.76	0.79	0.8	0.83	0.77	0.84
	isoleucine	1.94	0.12	0.12	0.08	0.08	0.79	0.55	0.46	0.52	1.08	0.73
	N-acetylisoleucine	1.03	0.92	1	1.66	1.62	0.73	0.48	0.84	0.8	0.83	0.92
	N-succinyl-isoleucine	0.24	0.64	0.66	0.58	0.73	0.49	0.7	0.65	0.7	0.75	0.69
	N-lactoyl isoleucine	14.36	1.45	2.22	10.18	8.51	1	1	1	1.02	5.11	2.46
	3-methyl-2-oxovalerate	2.57	1.18	1.24	1	1	1	1	1	1.3	1	1
	2-hydroxy-3-methylvalerate	7.48	2.62	5.16	2.4	0.94	1.95	28.4	8.82	10.91	32.85	19.98
	ethylmalonate	1.25	1.05	1.04	1.14	0.98	0.92	1.04	0.98	1.01	1.11	0.96
	methylsuccinate	1.07	1.02	1.03	0.99	1.02	0.78	0.93	0.93	0.93	1.03	0.97
	valine	3.23	0.32	0.23	0.29	0.49	0.81	0.5	0.39	0.41	1.03	0.73
	N-acetylvaline	2.69	1.13	1.05	2.21	2	0.88	0.54	0.82	0.73	0.77	0.76
	N-lactoyl valine	69.37	3.07	4.22	32.27	31.3	0.55	0.57	0.63	0.55	4.43	2.6
	alpha-hydroxyisovalerate	65.72	17.58	36.5	104.85	68.03	2.1	52.08	16.64	19.64	68.28	37.41
	isobutyrylglycine	1.88	1.32	1.42	1.21	1.15	1.02	1.24	1.3	1.3	1.76	1.05
	2,3-dihydroxy-2-methylbutyrate	5.92	5.73	1.26	8.26	4.91	0.96	0.45	0.45	0.45	0.45	0.45
Methionine, Cysteine, SAM and Taurine Metabolism	N-acetylmethionine	5.26	1.96	5.13	2.88	2.38	0.53	0.56	0.72	0.64	1.05	0.5
	N-formylmethionine	40.3	1.34	2.18	1.94	2.91	1	1	1	1	1	1
	S-methylmethionine	0.11	0.13	0.11	0.28	0.16	0.49	0.11	0.21	0.15	0.4	0.2
	methionine sulfone	0.08	0.11	0.71	0.39	0.33	0.38	0.08	0.08	0.12	0.08	0.08
	methionine sulfoxide	1.09	0.12	0.51	0.81	0.98	0.94	0.21	0.34	0.27	0.64	0.54
	N-acetylmethionine sulfoxide	3	1.01	2.74	2.77	7.21	1.46	1.37	1.58	1.63	1.81	2.15
	S-adenosylhomocysteine (SAH)	0.13	0.13	0.13	0.13	0.13	0.71	0.54	0.37	0.18	0.13	0.13
	cystathionine	1.11	1.28	1.89	0.63	0.63	2.69	7.73	3.3	3.36	3.88	3.83
	cysteine	1.07	0.52	0.56	0.31	0.16	0.34	0.87	0.75	0.73	1.17	0.49
	S-methylcysteine	0.11	0.25	0.23	0.29	0.41	0.55	0.11	0.11	0.11	0.11	0.11
	cysteine s-sulfate	1.64	1	1	1	1.37	1.73	10.97	16.72	14.22	9.7	7.81
	cystine	1.17	1	1.45	1.7	1.43	1.62	3.13	3.71	4.05	5.84	1
	cysteine sulfinic acid	0.29	0.26	0.33	1.05	1.66	2.28	0.72	0.96	0.81	0.77	0.84
	taurine	1.19	0.95	0.96	0.95	0.94	0.85	0.79	0.71	0.66	0.74	0.69
	N-acetyltaurine	0.56	0.62	0.75	0.66	0.71	0.68	1.17	0.75	0.86	1.06	0.74
	3-sulfo-L-alanine	2.04	0.54	0.88	1.89	1.77	1.83	1.35	1.59	0.78	0.68	1.71
	cyano-alanine	1.9	1.91	1.97	1.17	1.03	2.18	1	1.49	1.13	2.01	1.46
Urea cycle; Arginine and Proline Metabolism	arginine	0.94	0.08	0.06	0.37	1.03	0.89	0.39	0.53	0.35	0.37	0.64
	argininosuccinate	4.93	3.1	5.92	1.36	1.61	48.39	5.26	2.19	2.13	2.15	1.8
	3-amino-2-piperidone	14.93	1.45	1.09	1.15	1	1	1.02	1	1.24	1.6	1
	2-oxoarginine*	4.4	1.09	0.58	1.96	4.79	0.57	2.09	1.36	1.1	3.75	1.63
	citrulline	7.05	28.97	35.22	40.38	18.31	0.22	0.2	0.2	2.37	7.55	0.2
	homocitrulline	0.53	0.55	0.61	0.76	1.11	0.73	0.47	0.47	0.47	0.47	0.47
	proline	0.89	1.19	1.44	1.18	0.95	0.92	0.17	0.17	0.19	0.34	0.26
	dimethylarginine (SDMA + ADMA)	1.05	0.93	0.93	0.94	0.97	0.8	0.86	0.84	0.89	0.98	0.84
	N-acetylarginine	1.56	7.74	6.52	3.68	1.51	0.82	0.64	1.55	1.68	1.74	1.47
	N-acetylcitrulline	14.34	5.6	5.54	1.83	1	1	1	1	1	1.08	1
	N-acetylproline	1.29	1.08	0.93	1.09	1.31	0.84	4.28	3.35	4.09	4.48	3.8
	N-delta-acetylornithine	13.43	50.22	48.88	2.01	0.82	0.75	0.18	0.19	7.33	19.66	0.22
	N-alpha-acetylornithine	16.27	5.41	5.29	1.78	0.46	0.71	2.44	2.36	2.82	4.14	3.58
	trans-4-hydroxyproline	0.76	0.81	0.88	1.11	1.23	0.89	0.9	0.85	0.94	1.01	0.94
	N-methylproline	0.93	0.99	1.05	0.98	1.11	0.92	0.99	0.85	0.94	0.94	0.85
	N,N,N-trimethyl-alanylproline betaine (TMAP)	0.9	0.89	0.91	0.88	0.89	0.76	0.86	0.82	0.88	0.91	0.82
	N-monomethylarginine	0.88	0.55	0.53	0.96	0.95	0.85	0.88	0.86	0.87	0.97	0.9
	argininate*	1.12	1.78	1.33	1.59	1.46	0.62	2.14	1.09	1.97	7.1	1.22
Creatine Metabolism	guanidinoacetate	0.72	0.85	0.92	0.98	0.87	0.77	0.88	0.86	0.9	0.94	0.84
Polyamine Metabolism	agmatine	2.84	0.63	0.47	0.68	0.8	0.27	0.49	0.61	0.52	0.6	0.52
	putrescine	0.96	0.46	0.34	0.32	0.49	0.37	0.26	0.26	0.23	0.27	0.27
	N-acetylputrescine	3.85	1.76	1.51	2.26	3.21	0.81	5.71	3.69	3.92	6.24	4.96
	N-carbamoylputrescine	43.55	19.35	21.21	19.48	14.45	11.16	22.27	20.3	17.37	20.72	20.44
	N-acetyl-isoputreanine	1.05	0.84	1.01	0.78	0.89	0.81	0.85	0.76	0.8	0.95	0.9
	spermidine	0.03	0	0	0	0	0.07	0	0	0	0	0
	diacetylspermidine*	8.26	1.1	1.05	299.13	241.42	1	1	1	1	117.36	61.7
	(N(1) + N(8))-acetylspermidine	4.17	1.58	1.2	8.27	9.13	0.68	0.96	0.97	0.83	4.43	2.86
	spermine	0.03	0.03	0.03	0.03	0.03	0.05	0.03	0.03	0.03	0.03	0.03
	5-methylthioadenosine (MTA)	0.03	0.03	0.03	0.03	0.03	0.04	0.91	1.19	0.68	0.13	0.22
	4-acetamidobutanoate	1.52	1.22	0.76	0.85	1.02	0.66	1	0.97	1.09	1.1	0.76
Guanidino and Acetamido Metabolism	4-guanidinobutanoate	0.94	0.94	0.94	0.94	0.89	0.79	0.93	0.94	0.98	1.07	0.94
Glutathione Metabolism	glutathione, reduced (GSH)	0	0.01	0.01	0.01	0	0.01	0.03	0.01	0.01	0.02	0.01
	glutathione, oxidized (GSSG)	0.01	0.01	0.03	0.01	0.01	0.03	0.01	0.01	0.01	0.01	0.01
	cysteine-glutathione disulfide	0.18	0.26	0.64	0.77	0.2	0.62	0.38	0.18	0.18	0.2	0.18
	cysteinylglycine disulfide*	2.83	1	1.19	2.29	1.02	5.36	1.79	2.06	1.21	1.66	1
	5-oxoproline	0.11	0.74	0.96	0.83	0.88	0.69	0.06	0.08	0.06	0.11	0.09
	2-hydroxybutyrate/2-hydroxyisobutyrate	5.53	3.77	6.76	6.1	4.97	2.07	2.95	5.03	4.7	7.53	6.66
	ophthalmate	0.03	0.03	0.03	0.03	0.03	0.03	0.1	0.04	0.08	0.1	0.05
Gamma-glutamyl Amino Acid	gamma-glutamylalanine	0.08	2.41	2.97	3.12	0.03	1.66	0.05	0.11	0.06	0.03	0.03
	gamma-glutamylglutamate	0.77	9.04	10.96	9.43	1.11	7.96	1.08	2.11	2.44	1.07	0.29
	gamma-glutamylglutamine	0.07	2.54	3.51	1.98	1.06	1.72	0.07	0.18	0.12	0.09	0.08
	gamma-glutamylglycine	0.43	2.76	3.07	2.77	1.12	3.39	0.68	1.19	0.94	1.22	0.5
	gamma-glutamylhistidine	1.48	4.7	4.96	3.49	4.22	3.69	0.71	1.33	1.17	0.91	1.1
	gamma-glutamylisoleucine*	0.49	2.09	2.3	2.15	0.37	1.63	0.43	0.92	0.77	0.64	0.37
	gamma-glutamylleucine	1.86	4.15	4.28	4.61	0.94	3.24	0.94	0.94	0.94	0.94	0.94
	gamma-glutamyl-alpha-lysine	2.28	4.84	5.37	4.25	4.51	4.23	0.49	1.04	0.77	0.4	1.01
	gamma-glutamylmethionine	0.28	4.66	6.86	3.86	0.08	1.72	0.51	0.08	0.08	0.08	0.08
	gamma-glutamylphenylalanine	1.11	3.77	3.93	3.13	0.27	3.06	0.27	0.53	0.34	0.27	0.27
	gamma-glutamylthreonine	0.56	3.97	4.33	4.34	0.68	4.11	1.29	2.03	1.96	1.92	0.38
	gamma-glutamyltryptophan	0.49	4.37	4.97	3.38	0.17	2.76	0.17	0.17	0.17	0.17	0.17
	gamma-glutamyltyrosine	0.73	6.42	7.04	6.61	0.18	4.92	0.18	0.68	0.38	0.21	0.18
	gamma-glutamylvaline	0.89	1.65	1.81	1.64	0.08	1.35	0.23	0.61	0.55	0.38	0.07
	gamma-glutamylcitrulline*	1	5.76	8.98	1.14	1	1	1	1	1	1	1
Dipeptide	isoleucylglycine	24.64	1	1	1	1	1	1	1	1	1.22	1
	leucylglycine	37.59	1	1.2	1	1	1	1	1	1	1	1
	lysylleucine	24.79	0.95	0.95	0.95	0.95	0.95	1.82	3.31	3.14	14.28	6.1
	phenylalanylalanine	41.35	1.15	1.17	1	1	1	1	1	1	1	1
	phenylalanylglycine	36.71	1.4	1	1	1	1	1	1	1	2.89	1
	prolylglycine	47.95	7.25	5.6	1	1	1	1	1	1	1	1
	tyrosylglycine	3.63	0.4	0.4	0.4	0.4	1.08	0.4	0.4	0.4	2.14	1.11
	valylglutamine	11.76	0.3	0.23	0.23	0.23	0.25	0.35	0.64	0.61	1.69	0.73
	valylglycine	8.2	1	1	1	1	1	1	1	1	1.66	1.1
	leucylglutamine*	86.86	5.42	3.78	0.98	0.98	0.98	0.98	0.98	0.98	0.98	0.98
Glycolysis, Gluconeogenesis, and Pyruvate Metabolism	1,5-anhydroglucitol (1,5-AG)	0.88	1.63	1.63	2.16	1.98	0.71	1	1.26	1.02	1.88	1.19
	glucose	16.26	11.33	9.03	4.34	2.4	22.83	2.81	4.51	4.38	9.49	5.76
	glucose 6-phosphate	6.53	1.33	1.92	1.29	1.87	1.58	3.38	3.99	3.69	15.08	11.64
	glucose 1-phosphate	117.27	8.21	4.86	3.4	22.49	27.08	552.46	402.01	469.33	151.2	408.54
	fructose 1,6-diphosphate/glucose 1,6-diphosphate/myo-inositol diphosphates	26.45	5.09	4.41	2.72	4.86	15.25	13.8	8.73	7.8	7.17	6.95
	2-phosphoglycerate	118.24	11.82	1.07	1.18	14.52	1	7.92	2.06	1.85	22.66	23.59
	3-phosphoglycerate	53.77	8.52	1	1	16.31	1	3.76	1	1	9.37	10.01
	phosphoenolpyruvate (PEP)	345.3	23	2.92	2.02	38.05	1	19.99	6.69	6.6	58.16	53.13
	pyruvate	3.67	219.06	218.52	31.47	13.53	1.33	5	3.44	203.2	228.66	3.92
	lactate	37.29	27	102.7	377.5	252.3	2.77	14	5.62	12.58	151.67	49.86
	glycerate	1.53	0.6	0.34	0.86	1.63	0.97	0.68	1.09	0.71	1.2	1.65
Pentose Phosphate Pathway	6-phosphogluconate	92.06	11.85	1	1	1	1	1.6	1.41	1	2.24	1
	ribose 1-phosphate	222.3	1	1	6.62	19.77	28.55	30.29	119.28	1.55	1	188.64
	sedoheptulose-7-phosphate	8.25	1	1	1	1	1	3.87	1.91	1.38	3.61	4.83
Pentose Metabolism	ribose	62.29	118.01	89.21	170.89	192.89	88.96	123.22	139.6	466.75	378.19	147.27
	ribitol	2.08	0.82	0.83	1.08	0.98	0.85	1.48	1.16	1.25	1.48	1.25
	ribonate	1.28	1.52	1.19	1.09	1.11	1.05	1.39	1.34	1.17	1.17	1.08
	ribulose/xylulose	18.89	7.47	5.91	7.95	1.04	1.79	2.01	1.38	2.46	2.65	1.81
	xylose	22.94	0.69	7.12	6.6	5.09	6.64	3.87	3.77	4.75	7.57	5.27
	arabinose	182.43	7.68	7.73	4.05	4.25	6.17	3.9	5.6	6.02	9.2	7.13
	arabitol/xylitol	1.14	0.86	0.89	1.1	1.05	0.75	1.26	1.01	1.12	1.4	1.22
	arabonate/xylonate	2.5	1.72	1.12	1.02	1.15	0.94	1.17	1.35	1.1	1.13	0.98
	sedoheptulose	4.03	0.83	1.18	1.11	0.97	1.59	1.34	1.15	1.58	1.57	1.52
	ribulonate/xylulonate/lyxonate*	1.31	1.17	1.2	1.17	1.12	1.22	1.08	1.09	1.11	1.2	1.06
Glycogen Metabolism	maltopentaose	90.03	138.98	120.02	54.55	97.38	113.14	145.22	170	181.26	21.76	130.11
	maltotetraose	48.08	23.19	19.72	12.18	17.05	17.15	35.49	37.77	35.15	12.28	35.54
	maltotriose	38.18	8.76	8.06	7.36	8.08	9.72	11.12	12.9	12.52	12.14	11.53
	maltose	71.92	11.5	3.65	14.42	12.46	23.53	6.31	13.01	10.67	32.57	13.82
Disaccharides and Oligosaccharides	sucrose	0.01	0.43	0.76	0.7	0.87	0.24	0	0	0	0	0
	trehalose	0.81	0.94	0.67	0.14	0.07	1.04	14.22	4.26	7.13	6.04	4.56
	raffinose	0.16	2.38	2.83	2.95	3.36	0.57	0.13	0.13	0.13	0.13	0.13
Fructose, Mannose and Galactose Metabolism	fructose	4.92	5.33	3.95	0.67	0.46	18.6	0.42	0.47	0.37	0.38	0.41
	mannitol/sorbitol	0.66	3.09	6.62	0.75	0.03	1.44	0.86	0.87	0.91	0.67	0.35
	galactitol (dulcitol)	0.42	0.02	0.02	0.47	0.03	0.51	0.97	1.09	0.98	1	0.5
	galactonate	0.75	2.67	0.66	0.58	0.26	0.54	0.49	0.91	0.43	0.7	0.18
Nucleotide Sugar	UDP-glucose	1	1	1	1	1	1	3.08	1.67	1.88	1.31	1.49
	UDP-galactose	1	1	1	1	1	1	4.49	2.44	3.62	1.29	2.74
	UDP-N-acetylglucosamine/galactosamine	1	1	1	1	1	1	4.88	1.05	2.02	1	1
Aminosugar Metabolism	glucosaminate	0.74	0.86	0.91	0.93	0.86	0.77	0.84	0.88	0.87	0.9	0.81
	glucuronate	3.71	3.5	7.47	5.77	21.12	3.64	8.53	8.9	9.5	7.71	13.51
	N-acetylmuramate	1.14	1	1	1	1	1	1	1	1	1	1
	N-acetylglucosaminylasparagine	0.66	0.76	0.82	0.74	0.69	0.69	0.68	0.62	0.7	0.73	0.51
	erythronate*	1.45	0.97	1.03	0.96	0.96	0.92	1.25	1.11	1.16	1.26	1.08
	N-acetylglucosamine/N-acetylgalactosamine	0.68	0.19	0.91	0.06	0.07	0.96	0.23	0.59	0.58	0.36	0.26
TCA Cycle	citrate	0.3	0.72	1.02	0.92	0.13	0.85	0.93	1.03	1.04	0.86	0.57
	cis-aconitate	0.95	0.82	0.77	0.78	0.76	1	1.35	1.33	1.22	1.79	1.09
	isocitrate	0.22	0.32	0.13	0.86	0.07	0.16	1.12	0.91	0.81	1.97	0.46
	isocitric lactone	0.86	0.98	0.8	0.79	0.78	0.61	0.81	0.66	0.66	0.8	0.68
	alpha-ketoglutarate	9.6	9.96	3.12	1.97	7.96	0.61	6.26	0.79	0.97	1.22	1.26
	succinate	3.9	4.39	1.78	0.98	1.22	1.18	11.15	7.6	8.41	13.67	9.37
	fumarate	0.57	0.23	0.26	0.17	0.16	1.06	1.58	1.26	1.03	0.28	0.48
	malate	0.32	0.19	0.22	0.16	0.19	0.73	0.93	0.83	0.67	0.31	0.36
	trans-aconitate	5.24	5.29	2.56	1.46	1.4	2.28	8.02	9.1	9.94	6.89	5.66
	tricarballylate	1.86	1	1.05	2.73	1	0.97	1.06	1.05	1.06	20.18	0.97
	2-methylcitrate	5.63	3.91	3.69	3.15	1.01	2.66	6.54	5.26	4.61	5.98	4.54
	citraconate/glutaconate	0.77	1.1	1.07	1.03	1.03	0.92	1.6	2.19	2.05	2.13	1.96
Oxidative Phosphorylation	phosphate	4.09	3.55	3.18	2.98	3.03	2.9	4.19	4.03	4.27	4.36	3.79
Fatty Acid Synthesis	malonate	1.41	1.13	1.15	1.48	1.01	0.91	1.07	1	1.03	1.33	1.04
Short Chain Fatty Acid	butyrate (4:0)	1.16	1	1	1	1	1	4.83	4.12	4.92	4.46	3.34
Long Chain Saturated Fatty Acid	myristate (14:0)	1.43	1.12	0.91	0.48	0.78	0.96	0.78	1.01	1.13	0.7	1.03
	palmitate (16:0)	0.84	0.78	0.6	0.26	0.55	0.61	0.67	0.87	0.92	0.39	0.88
	margarate (17:0)	0.61	0.58	0.62	0.41	0.59	0.62	0.73	0.83	0.9	0.49	0.82
	stearate (18:0)	0.38	0.41	0.38	0.24	0.41	0.39	0.56	0.64	0.69	0.3	0.79
	nonadecanoate (19:0)	0.49	0.62	0.54	0.37	0.59	0.54	0.65	0.78	0.8	0.39	0.81
	arachidate (20:0)	0.87	0.61	0.53	0.26	0.46	0.57	0.68	0.76	0.84	0.4	0.89
Long Chain Monounsaturated Fatty Acid	palmitoleate (16:1n7)	2.11	1.29	1.04	0.7	0.92	1.26	2.28	2.25	2.67	2.48	2.46
	oleate/vaccenate (18:1)	0.73	0.69	0.39	0.14	0.35	0.5	0.51	0.63	0.64	0.2	0.57
	eicosenoate (20:1)	0.88	0.65	0.45	0.21	0.42	0.59	0.7	0.74	0.81	0.36	0.78
	erucate (22:1n9)	0.88	0.56	0.47	0.27	0.43	0.61	0.74	0.8	0.87	0.41	0.91
	nervonate (24:1n9)*	0.45	0.51	0.4	0.19	0.36	0.41	0.5	0.56	0.58	0.3	0.67
Long Chain Polyunsaturated Fatty Acid (n3 and n6)	tetradecadienoate (14:2)*	5.81	1.82	1.37	2.12	1.3	1.3	1.59	1.58	1.73	1.88	1.6
	hexadecadienoate (16:2n6)	4.3	1.82	1.47	1.4	1.24	1.51	1.05	1.19	1.44	1.19	1.27
	linoleate (18:2n6)	1.15	0.94	0.63	0.25	0.57	0.73	0.5	0.71	0.74	0.3	0.59
	linolenate [alpha or gamma; (18:3n3 or 6)]	2.1	1.37	1.03	0.58	0.82	1.05	0.66	0.84	0.99	0.6	0.76
	dihomo-linoleate (20:2n6)	0.77	0.73	0.52	0.33	0.48	0.66	0.99	1.01	1.02	0.57	0.98
	docosadienoate (22:2n6)	0.85	0.54	0.4	0.34	0.42	0.43	0.72	0.83	0.89	0.39	0.78
Fatty Acid, Dicarboxylate	dimethylmalonic acid	1.03	0.8	0.69	1.21	0.52	0.44	0.82	0.6	0.43	0.54	0.73
	glutarate (C5-DC)	2.18	1.21	0.93	0.96	1.73	0.85	5.01	3.91	4.51	5.81	5.38
	2-hydroxyglutarate	3.55	5.47	2.55	3.92	6.73	1.34	11.1	8.05	10.54	15.74	12.91
	2-hydroxyadipate	1.49	0.88	1.11	1.07	1.36	0.74	2.03	1.49	1.84	3.85	2.46
	3-hydroxyadipate*	17.07	2.01	0.96	3.07	3.13	4.94	1.17	1.98	1.67	7.32	3.17
	maleate	0.12	0.49	0.6	0.62	0.72	0.45	0.38	0.49	0.45	0.37	0.37
	suberate (C8-DC)	1.31	1.26	1.3	1.23	1.45	1.08	1.03	0.97	0.95	1.13	0.98
	azelate (C9-DC)	0.8	1.1	1.12	1.08	1.2	1.02	1.01	0.84	0.86	1.14	0.96
	sebacate (C10-DC)	0.56	1.26	1.38	1.16	1.46	1.2	1.13	0.85	0.96	1.3	1.07
	undecanedioate (C11-DC)	0.49	1.14	1.1	1.04	1.18	1.05	1.02	0.72	0.8	1.15	0.87
	dodecanedioate (C12-DC)	0.68	1.3	1.09	1.12	1.16	1.07	1.1	0.83	0.73	0.95	0.78
	3-hydroxydodecanedioate*	0.74	1.35	0.79	1.17	1.73	1.08	0.97	0.92	1.03	1.17	1.2
	hexadecanedioate (C16-DC)	0.42	0.94	0.77	1	0.95	0.89	1.34	0.76	0.78	0.93	0.69
	hexadecenedioate (C16:1-DC)*	0.44	0.95	0.82	0.81	0.83	0.68	0.5	0.5	0.53	0.6	0.43
	octadecanedioate (C18-DC)	0.55	1.08	1.11	0.97	0.83	0.91	1.19	1.04	1.3	1.63	1.01
	octadecenedioate (C18:1-DC)*	5	0.73	0.69	0.72	0.71	0.65	0.45	0.47	0.36	0.45	0.48
	2-hydroxysebacate	1.74	0.55	0.4	0.76	1.22	1.15	1.11	0.85	0.92	1.43	1.24
Fatty Acid, Amide	N-linoleoylserine*	177.86	11.69	4.16	0.43	0.57	0.65	0.52	0.53	0.69	0.37	0.77
Fatty Acid, Amino	2-aminoheptanoate	2.89	7.14	6.94	7.11	7.23	0.83	0.99	0.86	0.83	0.83	0.83
Fatty Acid Metabolism (also BCAA Metabolism)	methylmalonate (MMA)	3.1	1.2	0.87	0.96	1.48	1.01	0.95	0.87	1.19	0.79	0.97
Fatty Acid Metabolism (Acyl Glycine)	N-palmitoylglycine	16.46	0.73	0.51	0.41	0.66	0.43	0.54	0.52	0.6	0.28	0.69
	N-oleoylglycine	1.62	1	1	1	1	1	1	1	1	1	1
	N-linoleoylglycine	32.46	1.01	0.63	0.45	0.72	0.51	0.55	0.66	0.67	0.23	0.68
	8-hydroxyoctanoylglycine	1.04	1	1	1	1	1	1	1	1	1	1
Fatty Acid Metabolism (Acyl Carnitine, Short Chain)	acetylcarnitine (C2)	1.15	1.32	1.14	1.3	1.32	1.06	2.77	2.76	3.36	4.33	2.99
Fatty Acid Metabolism (Acyl Carnitine, Long Chain Saturated)	margaroylcarnitine (C17)*	9.82	1	1	1	1	1	3.45	3.13	5.36	3.67	3.5
Fatty Acid Metabolism (Acyl Carnitine, Monounsaturated)	cis-4-decenoylcarnitine (C10:1)	16.97	2.21	2.44	1	1	1	1	1	1	1	1
Carnitine Metabolism	deoxycarnitine	1.1	1.25	1.18	0.93	1.25	0.84	1.09	1.27	1.13	1.19	0.99
	carnitine	0.64	0.66	0.77	0.85	0.75	0.68	0.57	0.51	0.51	0.5	0.5
Ketone Bodies	3-hydroxybutyrate (BHBA)	6.65	1.96	1.51	1.56	1.43	2	3.79	2.6	2.59	2.14	2.34
Neurotransmitter	acetylcholine	0.99	1.21	1.02	1.53	1.62	0.68	6.32	3.34	4.74	4.94	4.05
Fatty Acid Metabolism (Acyl Choline)	palmitoylcholine	1.77	0.98	0.73	0.99	0.8	0.94	0.81	0.77	0.86	0.65	0.7
	oleoylcholine	4.15	1.57	1.16	1.57	1.14	1.47	0.98	0.89	1.01	0.81	0.83
	linoleoylcholine*	4.51	1.81	1.47	2	1.22	1.71	0.8	0.7	0.75	0.41	0.58
Fatty Acid, Monohydroxy	4-hydroxybutyrate (GHB)	2.32	1.14	1.21	1	2.44	1	4.05	2.31	3.12	5.3	4.49
	alpha-hydroxycaproate	0.2	0.22	0.41	0.31	0.32	0.58	0.2	0.23	0.2	0.2	0.23
	2-hydroxyheptanoate*	0.26	0.21	0.3	0.49	0.39	0.62	0.18	0.18	0.13	0.16	0.23
	2-hydroxydecanoate	0.78	0.64	0.7	0.91	1	0.87	0.52	0.59	0.5	0.61	0.49
	2-hydroxypalmitate	0.38	0.59	0.59	0.4	0.58	0.65	1.37	1	1.22	0.91	1.39
	2-hydroxyarachidate*	0.23	0.38	0.36	0.23	0.39	0.32	0.43	0.4	0.42	0.3	0.47
	2-hydroxybehenate	0.12	0.22	0.22	0.14	0.2	0.19	0.26	0.22	0.23	0.17	0.26
	3-hydroxyhexanoate	1.38	1.51	2.26	1.41	1.28	1	1.62	2.39	2.59	2.83	1.55
	3-hydroxyoctanoate	0.71	0.81	0.78	0.79	0.69	0.76	0.96	0.98	1.01	1.1	0.95
	3-hydroxydecanoate	1.27	1.23	0.99	2.2	1.05	1.03	2.12	1.46	1.6	2.89	1.72
	8-hydroxyoctanoate	0.77	1.11	1.18	1.08	0.86	1	1.24	1.2	1.07	1.42	1.11
	16-hydroxypalmitate	2.45	1.09	1.02	1	0.96	0.91	0.79	0.74	0.86	0.92	0.72
	13-HODE + 9-HODE	8.04	1.53	1.29	1.25	1.43	2.8	2.5	2.4	3.39	2.42	2.85
Fatty Acid, Dihydroxy	12,13-DiHOME	8.19	1.49	1.12	1.12	1.02	0.83	0.8	0.76	0.79	0.97	0.76
	9,10-DiHOME	5.31	1.24	0.95	1.1	1.93	0.8	0.72	0.61	0.69	0.84	0.77
	2S,3R-dihydroxybutyrate	3.05	1.57	1.28	1.6	1.67	1.43	11.07	12.14	10.55	13.48	14.84
	2R,3R-dihydroxybutyrate	1.42	1.55	1.37	3.34	1.57	1.13	3.42	3.8	3.29	4.94	5.02
	2,4-dihydroxybutyrate	2.62	1.72	1.39	1.54	1.56	1.21	1.9	1.34	1.51	2.33	1.8
	3,4-dihydroxybutyrate	2.05	1.19	1.37	1.68	1.2	1.47	1.28	1.1	1.34	1.44	1.38
Fatty Acid, Oxidized	12(13)-EpOME	2.61	1.33	1.02	1.26	1.55	1.54	1.1	1.08	1.38	1.24	1.37
	9(10)-EpOME	3.58	1.34	1.17	0.97	1.06	1.46	1.11	1.1	1.43	1.17	1.27
Endocannabinoid	oleoyl ethanolamide	0.71	1.2	1.03	1.32	1.13	0.91	1.03	0.98	1.22	1.29	1.01
	palmitoyl ethanolamide	0.67	1.1	0.96	1.2	1.05	0.94	0.98	0.92	1.07	1.16	0.94
	linoleoyl ethanolamide	0.11	0.41	0.29	0.19	0.41	0.3	0.5	0.48	0.54	0.25	0.58
	N-oleoylserine	130.09	6.86	2.72	1.95	1.68	1.27	1.11	1.39	0.83	0.94	0.78
	N-palmitoylserine	107.59	4.96	2.7	0.92	1.01	0.8	0.56	0.65	0.8	0.5	0.56
Inositol Metabolism	myo-inositol	2.45	2.27	1.84	1.61	1.84	1.81	2.7	2.86	2.87	2.81	2.88
	chiro-inositol	0.91	0.63	0.91	1.2	0.86	1.84	1.07	0.84	1.04	1.21	0.78
	inositol 1-phosphate (I1P)	20.98	10.03	15.63	11.48	14.89	7.57	8.17	5.89	5.13	12.06	6.15
	inositol triphosphate	0.39	0.23	0.27	0.06	0.17	1.65	0.54	0.38	0.3	0.27	0.26
	myo-inositol tetraphosphate	0.01	0.01	0.01	0.01	0.01	0.45	0.02	0.02	0.01	0.02	0.01
	inositol pentakisphosphate	0	0	0	0	0	0.05	0	0	0	0	0
	inositol hexakisphosphate	0	0	0	0	0	0.03	0	0	0	0	0
Phospholipid Metabolism	choline	1.56	1.49	1.24	1.24	1.31	1.24	1.39	1.41	1.49	1.47	1.38
	choline phosphate	7.14	2.62	1.94	1.44	1.95	2.98	2.14	2.18	1.94	1.36	1.48
	glycerophosphorylcholine (GPC)	0.47	0.74	1.05	1.04	0.95	1.01	0.88	0.9	0.96	1.09	0.93
	phosphoethanolamine	10.74	1.44	2.53	2	3.92	3.66	8.02	8.24	7.44	4.77	6.23
	glycerophosphoethanolamine	2.15	1.86	1.82	1.68	1.45	3.22	3.74	3.49	4.08	5.26	3.87
	glycerophosphoserine*	0.67	0.71	1.2	1.19	1.17	1.13	2.15	2.14	2.56	3.57	2.53
	glycerophosphoinositol*	0.95	1.14	1.33	1.49	1.25	0.49	0.77	0.68	0.6	0.65	0.53
Phosphatidic acid (PA)	1-palmitoyl-2-linoleoyl-GPA (16:0/18:2)*	0.57	2.2	3.05	2.38	2.53	0.95	0.93	0.57	0.35	1.04	0.74
	1,2-dilinoleoyl-GPA (18:2/18:2)*	0.47	1.4	1.85	1.87	1.33	0.68	0.5	0.28	0.18	0.43	0.3
Phosphatidylcholine (PC)	1-myristoyl-2-palmitoyl-GPC (14:0/16:0)	0.54	0.8	0.75	0.91	0.83	0.63	0.54	0.54	0.54	0.54	0.54
	1,2-dipalmitoyl-GPC (16:0/16:0)	0.69	0.97	0.9	0.98	0.9	0.85	0.66	0.6	0.6	0.62	0.57
	1-palmitoyl-2-palmitoleoyl-GPC (16:0/16:1)*	0.34	0.74	0.68	0.84	0.82	0.44	0.19	0.13	0.1	0.16	0.12
	1-palmitoyl-2-stearoyl-GPC (16:0/18:0)	0.52	0.95	0.81	0.98	0.84	0.69	0.5	0.45	0.48	0.49	0.44
	1-palmitoyl-2-oleoyl-GPC (16:0/18:1)	0.55	0.89	0.85	0.98	0.92	0.67	0.4	0.31	0.25	0.33	0.27
	1-palmitoyl-2-linoleoyl-GPC (16:0/18:2)	0.47	0.86	0.81	0.93	0.88	0.58	0.26	0.16	0.12	0.2	0.14
	1-palmitoyl-2-alpha-linolenoyl-GPC (16:0/18:3n3)*	0.26	0.64	0.64	0.74	0.74	0.33	0.13	0.08	0.06	0.09	0.07
	1-palmitoleoyl-2-linoleoyl-GPC (16:1/18:2)*	0.27	0.72	0.69	0.96	0.69	0.29	0.11	0.05	0.05	0.1	0.05
	1-stearoyl-2-oleoyl-GPC (18:0/18:1)	0.47	0.86	0.8	0.98	0.91	0.57	0.38	0.29	0.27	0.32	0.28
	1,2-dioleoyl-GPC (18:1/18:1)	0.43	0.81	0.79	0.91	0.86	0.44	0.19	0.11	0.09	0.17	0.1
	1-oleoyl-2-linoleoyl-GPC (18:1/18:2)*	0.4	0.76	0.74	0.85	0.81	0.4	0.15	0.08	0.07	0.12	0.08
	1,2-dilinoleoyl-GPC (18:2/18:2)	0.23	0.64	0.65	0.76	0.72	0.25	0.08	0.04	0.03	0.06	0.04
	1-linoleoyl-2-linolenoyl-GPC (18:2/18:3)*	0.21	0.6	0.56	0.69	0.59	0.18	0.07	0.07	0.07	0.07	0.07
Phosphatidylethanolamine (PE)	1,2-dipalmitoyl-GPE (16:0/16:0)*	0.3	1.02	0.78	0.77	0.73	0.57	0.42	0.37	0.3	0.31	0.3
	1-palmitoyl-2-oleoyl-GPE (16:0/18:1)	0.41	0.85	0.8	0.99	0.88	0.54	0.37	0.31	0.27	0.29	0.25
	1-palmitoyl-2-linoleoyl-GPE (16:0/18:2)	0.34	0.78	0.76	0.92	0.82	0.45	0.28	0.2	0.16	0.21	0.15
	1-stearoyl-2-oleoyl-GPE (18:0/18:1)	0.12	0.67	0.68	1.08	0.68	0.42	0.15	0.16	0.12	0.12	0.14
	1,2-dioleoyl-GPE (18:1/18:1)	0.33	0.77	0.74	0.94	0.83	0.36	0.18	0.12	0.09	0.14	0.09
	1-oleoyl-2-linoleoyl-GPE (18:1/18:2)*	0.28	0.7	0.7	0.85	0.76	0.31	0.14	0.09	0.07	0.11	0.07
	1,2-dilinoleoyl-GPE (18:2/18:2)*	0.24	0.64	0.64	0.82	0.69	0.24	0.1	0.06	0.05	0.08	0.04
Phosphatidylglycerol (PG)	1,2-dipalmitoyl-GPG (16:0/16:0)	1.08	0.87	0.82	0.9	0.85	0.68	0.37	0.38	0.37	0.35	0.33
	1-palmitoyl-2-oleoyl-GPG (16:0/18:1)	0.32	0.73	0.73	0.99	0.87	0.43	0.21	0.1	0.1	0.22	0.12
	1-palmitoyl-2-linoleoyl-GPG (16:0/18:2)	0.51	0.71	0.76	0.82	0.82	0.44	0.17	0.15	0.09	0.11	0.1
Phosphatidylinositol (PI)	1-palmitoyl-2-oleoyl-GPI (16:0/18:1)*	0.04	0.29	0.23	0.45	0.3	0.11	0.09	0.09	0.06	0.07	0.06
	1-palmitoyl-2-linoleoyl-GPI (16:0/18:2)	0.03	0.25	0.21	0.41	0.24	0.08	0.05	0.02	0.02	0.02	0.02
	1-oleoyl-2-linoleoyl-GPI (18:1/18:2)*	0.06	0.24	0.22	0.44	0.25	0.09	0.04	0.03	0.03	0.02	0.02
Lysophospholipid	1-palmitoyl-GPA (16:0)	0.05	0.32	0.28	0.18	0.23	0.13	0.12	0.17	0.16	0.12	0.18
	1-oleoyl-GPA (18:1)	0.23	0.8	0.49	1.13	0.35	0.39	0.17	0.17	0.17	0.17	0.17
	1-palmitoyl-GPC (16:0)	1.23	1.19	0.98	1.21	0.73	1.03	0.73	0.72	0.65	0.43	0.5
	2-palmitoyl-GPC (16:0)*	0.37	0.65	0.52	0.35	0.46	0.59	0.53	0.63	0.51	0.19	0.49
	1-palmitoleoyl-GPC (16:1)*	0.74	0.66	0.62	0.86	0.56	0.64	0.7	0.28	0.23	0.24	0.22
	1-stearoyl-GPC (18:0)	2.55	2.31	1.92	2.34	2.05	1.85	2.33	2.2	2.5	2.77	2.41
	1-oleoyl-GPC (18:1)	2.17	1.65	1.62	1.89	1.14	1.79	1.23	1.04	0.9	0.51	0.72
	1-linoleoyl-GPC (18:2)	0.51	0.6	0.55	0.78	0.4	0.5	0.22	0.19	0.18	0.16	0.13
	1-linolenoyl-GPC (18:3)*	0.33	0.42	0.37	0.59	0.3	0.31	0.09	0.09	0.12	0.09	0.09
	1-palmitoyl-GPE (16:0)	0.99	0.97	0.82	0.99	0.51	0.92	0.73	0.71	0.68	0.44	0.48
	1-stearoyl-GPE (18:0)	2.35	2.31	1.78	2.27	1.52	1.95	2.23	2.04	2.5	1.95	1.92
	1-oleoyl-GPE (18:1)	2.13	1.49	1.28	1.33	0.67	1.69	1.13	1.19	1	0.43	0.72
	1-linoleoyl-GPE (18:2)*	0.63	0.64	0.62	0.79	0.4	0.56	0.3	0.26	0.28	0.23	0.17
	1-palmitoyl-GPS (16:0)*	0.19	0.51	0.47	0.27	0.34	0.78	5.19	3.75	4.55	2.42	5.48
	1-linoleoyl-GPS (18:2)*	0.25	0.28	0.3	0.22	0.19	0.28	0.24	0.26	0.19	0.1	0.14
	1-palmitoyl-GPG (16:0)*	0.36	0.62	0.56	0.35	0.44	0.61	0.64	0.67	0.67	0.22	0.55
	1-stearoyl-GPG (18:0)	1.23	2.07	1.28	0.87	1.84	1.82	2.91	2.45	3.14	1.33	2.99
	1-oleoyl-GPG (18:1)*	0.59	1.3	1.17	0.46	0.81	1.07	1.33	1.41	1.3	0.33	1.2
	1-linoleoyl-GPG (18:2)*	0.27	0.46	0.43	0.3	0.27	0.44	0.29	0.26	0.26	0.09	0.19
	1-palmitoyl-GPI (16:0)	0.12	0.41	0.36	0.23	0.41	0.29	0.74	0.66	0.66	0.28	0.64
	1-stearoyl-GPI (18:0)	0.38	0.79	0.63	0.47	0.93	0.74	4.49	4.15	5.06	4.29	5.4
	1-oleoyl-GPI (18:1)	0.12	0.42	0.36	0.24	0.43	0.24	0.31	0.31	0.26	0.05	0.27
	1-linoleoyl-GPI (18:2)*	0.04	0.12	0.13	0.14	0.11	0.08	0.06	0.05	0.04	0.01	0.03
Glycerolipid Metabolism	glycerol	3.37	1.44	1.55	1.21	0.16	5.13	3.38	8.67	6.98	2.83	2.66
	glycerol 3-phosphate	5.74	12.14	4.78	4	1.37	2.04	1.55	1.71	1.62	1.51	1.23
	glycerophosphoglycerol	1.4	1.38	2.44	2.37	1.8	1.62	1.39	2.26	2.28	3.32	1.96
Monoacylglycerol	1-myristoylglycerol (14:0)	0.52	0.37	0.27	0.19	0.43	0.32	0.34	0.3	0.34	0.2	0.42
	1-palmitoylglycerol (16:0)	0.92	0.56	0.46	0.32	0.39	0.68	0.93	0.54	0.62	0.32	0.81
	1-oleoylglycerol (18:1)	0.95	0.45	0.37	0.18	0.38	0.48	0.7	0.66	0.82	0.23	0.64
	1-linoleoylglycerol (18:2)	0.69	0.28	0.22	0.1	0.24	0.33	0.44	0.42	0.5	0.17	0.4
	1-linolenoylglycerol (18:3)	0.83	0.28	0.21	0.09	0.18	0.3	0.35	0.33	0.38	0.15	0.36
	2-palmitoylglycerol (16:0)	0.83	0.56	0.41	0.28	0.52	0.73	0.91	0.58	0.64	0.34	0.9
	2-oleoylglycerol (18:1)	1.05	0.65	0.49	0.27	0.58	0.82	0.98	0.77	0.87	0.3	0.67
	2-linoleoylglycerol (18:2)	0.87	0.45	0.28	0.23	0.37	0.56	0.69	0.46	0.54	0.21	0.46
	1-oleoyl-sulfoquinovopyranosyl-glycerol (18:1)*	0.44	0.91	0.85	0.42	0.83	0.81	0.78	0.99	0.81	0.28	0.71
	1-palmitoyl-sulfoquinovopyranosyl-glycerol (16:0) *	0.7	1.18	1.06	0.41	0.93	1.2	1.14	1.34	1.21	0.14	0.94
	1-linoleoyl-sulfoquinovopyranosyl-glycerol (18:2)*	0.16	0.41	0.48	0.27	0.36	0.28	0.15	0.22	0.14	0.1	0.1
Diacylglycerol	diacylglycerol (12:0/18:1, 14:0/16:1, 16:0/14:1) [1]*	4.02	1.59	1.42	1.34	1.06	0.91	1.66	1.8	1.61	2.07	1.75
	diacylglycerol (12:0/18:1, 14:0/16:1, 16:0/14:1) [2]*	1.3	1.93	1.74	1.85	1.86	1.78	2.08	1.98	2.23	2.21	1.88
	diacylglycerol (14:0/18:1, 16:0/16:1) [1]*	3.71	1.58	1.55	1.43	1.2	1.05	1.44	1.31	1.5	1.54	1.23
	diacylglycerol (14:0/18:1, 16:0/16:1) [2]*	3.04	2.9	2.54	2.84	2.56	2.5	2.98	2.79	3.14	3.28	2.68
	diacylglycerol (16:1/18:2 [2], 16:0/18:3 [1])*	3.14	2.08	2	1.79	1.74	1.8	2.39	2.17	2.44	2.22	2.06
	palmitoyl-myristoyl-glycerol (16:0/14:0) [1]*	8.25	1.58	1.9	1.3	1.17	0.91	1.22	1.1	1.28	1.34	1
	palmitoyl-myristoyl-glycerol (16:0/14:0) [2]	3.12	2.44	2.19	2.59	2.3	1.72	2.68	2.16	2.6	2.59	2.38
	palmitoyl-palmitoyl-glycerol (16:0/16:0) [1]*	5.24	1.22	1.55	1.08	0.94	0.91	1.06	0.94	0.97	0.96	0.91
	palmitoyl-palmitoyl-glycerol (16:0/16:0) [2]*	3.19	1.6	1.6	1.42	1.33	1.28	1.51	1.35	1.47	1.46	1.33
	palmitoyl-oleoyl-glycerol (16:0/18:1) [1]*	2.64	1.44	1.49	1.24	1.15	1.16	1.44	1.33	1.4	1.4	1.27
	palmitoyl-oleoyl-glycerol (16:0/18:1) [2]*	2.51	2.51	2.35	2.37	2.19	2.04	2.32	2.15	2.29	2.3	2.03
	palmitoyl-linoleoyl-glycerol (16:0/18:2) [1]*	1.86	1.48	1.44	1.29	1.27	1.23	1.5	1.42	1.5	1.53	1.39
	palmitoyl-linoleoyl-glycerol (16:0/18:2) [2]*	2.15	2.5	2.33	2.35	2.22	2	2.1	2.04	2.08	2.24	1.91
	palmitoyl-linolenoyl-glycerol (16:0/18:3) [2]*	4.31	5.14	4.61	4.47	4.04	3.6	3.91	3.44	3.79	4.21	3.06
	palmitoleoyl-linoleoyl-glycerol (16:1/18:2) [1]*	2.31	1.47	1.4	1.28	1.1	0.95	1.36	1.22	1.49	1.44	1.23
	oleoyl-oleoyl-glycerol (18:1/18:1) [1]*	2.56	1.35	1.3	1.19	1.03	1.08	1.28	1.2	1.3	1.22	1.13
	oleoyl-oleoyl-glycerol (18:1/18:1) [2]*	3.23	1.94	1.76	1.72	1.53	1.94	2.13	1.96	2.24	1.95	1.87
	oleoyl-linoleoyl-glycerol (18:1/18:2) [1]	2.33	1.31	1.28	1.17	1.08	1.09	1.26	1.2	1.32	1.24	1.17
	oleoyl-linoleoyl-glycerol (18:1/18:2) [2]	2.98	1.77	1.62	1.56	1.42	1.76	1.9	1.79	2.02	1.82	1.74
	oleoyl-linolenoyl-glycerol (18:1/18:3) [2]*	5.47	3.53	2.82	2.78	2.19	2.72	2.79	2.91	2.84	3.42	2.71
	linoleoyl-linoleoyl-glycerol (18:2/18:2) [1]*	1.97	1.27	1.22	1.14	1.05	0.98	1.19	1.13	1.28	1.2	1.09
	linoleoyl-linoleoyl-glycerol (18:2/18:2) [2]*	4.76	3.03	2.64	2.59	2.16	2.94	3.02	2.72	3.11	3.1	2.56
	linoleoyl-linolenoyl-glycerol (18:2/18:3) [1]*	2.83	1.42	1.4	1.2	1.04	0.97	1.26	1.22	1.43	1.36	1.13
	linoleoyl-linolenoyl-glycerol (18:2/18:3) [2]*	5.68	2.74	2.44	2.32	2	2.43	2.99	2.59	3.36	2.95	2.46
	linolenoyl-linolenoyl-glycerol (18:3/18:3) [1]*	2.86	1.36	1.32	0.8	0.93	0.83	1.99	1.85	2.18	1.94	1.71
	linolenoyl-linolenoyl-glycerol (18:3/18:3) [2]*	12.1	5.92	5.68	6.09	3.87	6	8.94	9.24	11.5	10.33	8.18
Galactosyl Glycerolipids	galactosylglycerol	5.03	1.66	1.12	3.78	4.4	4.04	2.67	5.41	1.95	1.23	2.87
	digalactosylglycerol*	0.66	0.4	0.56	0.34	0.48	0.64	0.23	0.25	0.25	0.22	0.24
	1-palmitoyl-2-linoleoyl-digalactosylglycerol (16:0/18:2)*	0.71	1.06	0.97	1.28	1.08	0.61	0.6	0.51	0.59	0.7	0.55
	1-palmitoyl-2-linoleoyl-galactosylglycerol (16:0/18:2)*	0.23	0.68	0.52	0.87	0.76	0.32	0.3	0.29	0.28	0.39	0.26
	1-palmitoyl-2-linolenoyl-digalactosylglycerol (16:0/18:3)	0.85	0.89	0.96	0.82	0.86	0.71	0.87	0.93	0.97	1.2	0.92
	1,2-dilinoleoyl-digalactosylglycerol (18:2/18:2)*	0.64	0.89	0.83	0.89	0.85	0.47	0.5	0.43	0.46	0.6	0.43
	1,2-dilinoleoyl-galactosylglycerol (18:2/18:2)*	0.39	0.76	0.71	0.84	0.79	0.33	0.34	0.3	0.28	0.4	0.26
	1-linoleoyl-2-linolenoyl-galactosylglycerol (18:2/18:3)*	0.25	0.62	0.63	0.66	0.59	0.24	0.26	0.22	0.19	0.28	0.19
	1-linoleoyl-2-linolenoyl-digalactosylglycerol (18:2/18:3)*	0.53	0.85	0.75	0.89	0.85	0.42	0.41	0.33	0.37	0.49	0.32
	1,2-dilinolenoyl-galactosylglycerol (18:3/18:3)*	0.41	0.88	0.74	0.75	0.7	0.22	0.31	0.21	0.24	0.36	0.19
	1,2-dilinolenoyl-digalactosylglycerol (18:3/18:3)	0.52	0.89	0.8	1	0.8	0.39	0.4	0.32	0.33	0.44	0.28
	1-linoleoyl-digalactosylglycerol (18:2)*	0.16	0.3	0.22	0.19	0.23	0.29	0.27	0.3	0.3	0.06	0.24
	1-linoleoyl-galactosylglycerol (18:2)*	0.11	0.24	0.15	0.14	0.17	0.2	0.23	0.26	0.26	0.05	0.22
	2-palmitoyl-galactosylglycerol (16:0)*	0.18	0.33	0.28	0.2	0.29	0.38	0.39	0.56	0.49	0.1	0.5
	2-palmitoyl-digalactosylglycerol (16:0)*	0.36	0.46	0.32	0.24	0.44	0.4	0.43	0.58	0.47	0.17	0.42
	1-palmitoyl-digalactosylglycerol (16:0)*	0.4	0.55	0.43	0.34	0.5	0.59	0.6	0.75	0.61	0.16	0.57
	1-palmitoyl-galactosylglycerol (16:0)*	0.25	0.41	0.3	0.22	0.3	0.43	0.43	0.55	0.45	0.11	0.4
Sphingolipid Synthesis	sphinganine	1.23	1.7	1.4	2.11	1.82	1.3	2.05	2.22	2.32	3.5	2.5
	sphingadienine	0.68	1.41	1.12	1.93	1.39	0.74	0.92	0.8	1.02	1.09	0.73
	phytosphingosine	0.9	1.4	1.27	1.73	1.38	0.98	1.22	1.45	1.54	1.58	1.42
Dihydroceramides	N-palmitoyl-sphinganine (d18:0/16:0)	0.69	0.9	0.8	1.01	0.86	0.7	0.71	0.69	0.74	0.84	0.69
Sphingosines	sphingosine	0.72	1.33	1.25	1.74	1.4	0.83	1.21	0.82	0.98	1.25	1.28
	dehydrophytosphingosine*	1.03	1.56	1.25	1.86	1.51	0.98	0.97	1.27	1.49	1.4	1.22
Mevalonate Metabolism	3-hydroxy-3-methylglutarate	2.24	0.67	1.26	1.15	1.09	1.65	3.38	2.58	2.73	3.36	2.66
	mevalonate	4.2	8.57	10.41	9.39	6.36	1.43	7.96	7.14	7.72	12.81	18.51
	mevalonolactone	11.38	28.95	32.2	28.96	19.62	1.52	37.83	26.56	32.59	60.37	74.94
Sterol	beta-sitosterol	1.06	1.2	1.2	1.27	1.12	0.93	1.03	0.95	1.11	1.12	0.92
	stigmasterol	1.07	1.1	1.11	1.14	1.04	0.87	0.94	0.9	0.92	0.96	0.81
	campesterol	1.02	1.18	1.14	1.26	1.08	0.87	0.94	0.89	1.04	1.06	0.84
Purine Metabolism, (Hypo)Xanthine/Inosine containing	inosine	23.77	0.04	0.04	3.67	20.84	3	7.1	13.16	1.01	0.35	51.45
	hypoxanthine	32.02	73.7	10.35	30.88	48.23	11.74	8.93	8.61	35.25	61.53	15.68
	xanthine	28.09	3.96	2.51	19.87	18.3	2.23	9.07	5.88	23.64	43.52	17.26
	xanthosine	2.8	0.18	0.18	0.25	0.4	0.64	0.77	0.74	0.25	0.18	0.82
	N1-methylinosine	9.18	1	1	1.15	3.35	3.62	9.78	9.89	1.49	1	11.57
	allantoin	0.65	0.9	0.88	0.96	0.91	0.79	0.08	0.57	0.37	0.18	0.33
	allantoic acid	2.42	0.48	0.77	0.57	0.7	1.76	0.91	1.99	1.63	1.06	1.64
Purine Metabolism, Adenine containing	adenosine 5'-monophosphate (AMP)	0.08	0.1	0.2	0.41	0.21	0.13	0.7	0.19	0.15	0.11	0.15
	adenosine 3'-monophosphate (3'-AMP)	4.34	1.55	3.86	5.3	1.21	1.23	1.12	2.06	1.72	4.1	1.72
	adenosine 2'-monophosphate (2'-AMP)	15.92	16.14	34.43	27.47	44.68	27.27	6.67	3.62	2.48	1.14	2.81
	adenosine-2',3'-cyclic monophosphate	6.28	8.11	14.65	15.77	11.24	21.33	1.82	3.11	2.41	3.15	2.77
	adenosine	1.43	0.02	0.01	0.7	0.3	2.19	3.26	2.91	0.56	0.03	1.52
	adenine	1.84	4.21	11.01	7.62	4.15	0.03	2.22	2.25	8.67	6.06	1.23
	1-methyladenine	1.67	1.88	1.57	1.12	0.95	0.74	1.02	0.85	1.58	2.62	0.87
	N1-methyladenosine	27.24	1.21	0.35	6.47	12.09	7.43	22.89	20.55	15.83	7.73	24.23
	N6-methyladenosine	10.24	0.52	0.52	1.34	0.81	5.33	7.67	8.08	1.21	0.67	6.47
	2'-O-methyladenosine	21.09	3.36	10.39	1.28	0.28	11.08	27.6	21.09	28.56	0.34	7.47
	N6-carbamoylthreonyladenosine	3.21	0.36	0.36	0.78	1.49	1.73	3.57	3.4	1.59	0.38	4.11
	2'-deoxyadenosine	10.01	7.56	39.24	13.39	3.39	9.5	20.09	23.06	28.12	16.46	11.05
	N6-succinyladenosine	1.3	1.05	1.04	0.8	0.88	1.49	1.94	1.45	1.42	0.8	1.5
Purine Metabolism, Guanine containing	guanosine 5'- monophosphate (5'-GMP)	20.44	9.15	20.83	15.84	16.8	15.24	12.98	9.35	9.33	10.02	10.7
	guanosine-2',3'-cyclic monophosphate	5.3	7.48	12.08	10.36	5.53	9.25	2.2	3.01	3.01	4.21	2.77
	guanosine	10.22	0.07	0.05	4.67	6.29	9.25	18.91	19.01	2.95	0.08	17
	guanine	18.19	100.22	94.7	37.43	39.28	10.71	15.57	15.75	66.83	1.15	7.56
	1-methylguanine	1.02	5.09	2.82	2.18	1.64	1	1	1	4.72	10.07	1
	7-methylguanine	10.83	6.17	5.57	2.21	2.98	1.59	9.31	4.98	9.04	15.52	7.23
	2'-O-methylguanosine	16.43	1.49	1.6	9.55	18.44	2.86	9.92	7.82	6.4	28.38	18.68
	N2,N2-dimethylguanosine	9.52	0.43	0.41	0.85	2.11	1.78	3.31	2.74	1.38	1.69	4.96
	2'-deoxyguanosine	11.81	41.91	52.28	8.27	11.73	6.18	17.64	22.16	28.98	1.15	15.53
	guanosine 2'-monophosphate (2'-GMP)*	4.6	1.62	4.45	3.04	3.27	3.29	2.65	2.03	1.99	1.99	2.14
Pyrimidine Metabolism, Orotate containing	N-carbamoylaspartate	2.67	0.95	1.11	1.68	0.66	0.77	0.85	0.95	0.75	1.07	0.97
	dihydroorotate	0.75	0.45	0.54	0.96	0.9	0.36	0.9	0.73	0.74	0.85	0.75
	orotate	2.79	0.31	0.29	1.27	1.4	1.88	2.15	2.58	1.54	3.34	4.67
Pyrimidine Metabolism, Uracil containing	uridine 5'-monophosphate (UMP)	1.32	0.36	0.89	2.05	2.16	0.31	3.76	1.7	1.27	0.49	1.38
	uridine 3'-monophosphate (3'-UMP)	2.46	1.72	9.71	8.2	5.96	3.7	4.65	2.96	2.66	2.63	3.08
	uridine-2',3'-cyclic monophosphate	37.96	15.6	43.13	34.24	21.96	32.71	9.17	11.54	10.53	16.01	11.15
	uridine	2.61	0.07	0.04	1.68	3.91	1.93	3.19	4.25	0.65	0.14	3.35
	uracil	80.65	89.76	85.21	42.54	29.14	15.57	51.57	44.52	80.91	97.76	51.07
	pseudouridine	9.73	6.69	5.48	5.71	5.22	3.83	9.82	8.9	9.29	11.41	9.29
	5,6-dihydrouridine	9.15	0.63	0.38	3.03	3.65	1.9	5.5	4.81	4.49	5.55	5.5
	2'-O-methyluridine	15.9	3.3	2.88	16.52	37.53	3.86	9.73	7.77	7.84	38.99	25.3
	5-methyluridine (ribothymidine)	9.99	0.12	0.12	1.56	5.15	1.39	5.19	6.04	0.92	0.12	3.98
	2'-deoxyuridine	12.4	23.91	11.96	25.24	33.35	7.91	24.11	28.54	40.94	57.97	53.98
	3-ureidopropionate	2.18	2.99	0.83	0.81	0.97	0.9	0.76	0.78	0.76	0.78	0.7
	beta-alanine	0.36	0.89	0.99	1.1	0.99	0.78	0.57	0.72	0.7	0.78	0.63
	N-acetyl-beta-alanine	1.96	1.33	0.86	1.38	0.87	1.12	14.59	7.92	9.52	13.51	9.83
	3-(3-amino-3-carboxypropyl)uridine*	1.08	0.86	0.94	0.92	1.06	0.83	1.4	1.21	1.37	1.81	1.38
Pyrimidine Metabolism, Cytidine containing	cytidine 5'-monophosphate (5'-CMP)	1.25	1.09	1.69	2.55	2.11	0.76	1.5	0.74	0.38	0.37	0.58
	cytidine 2' or 3'-monophosphate (2' or 3'-CMP)	2.14	1.43	5.1	3.59	2.64	1.62	3	1.95	2.15	1.87	2.02
	cytidine 2',3'-cyclic monophosphate	4.27	4.19	14.14	8.66	5.15	2.84	1.06	1.42	1.29	1.31	1.33
	cytidine	1.8	0.26	0.4	5.65	6.28	3.14	4.78	1.82	1.19	0.24	2.89
	cytosine	1.68	19.17	19.15	25.88	13.82	1.19	6.1	3.62	25.87	16.52	5.16
	3-methylcytidine	4.37	1	1	1.57	3.91	1.12	4.19	4.89	2.82	2.59	5.07
	5-methylcytidine	7.09	0.89	0.89	4.08	15.55	7.41	35.86	18.11	0.89	0.89	31.42
	2'-deoxycytidine	6.72	1.33	11.88	15.04	19.68	7.7	4.93	0.7	13.51	7.27	10.34
	2'-O-methylcytidine	21.23	3.17	6.9	34.83	29.4	11.06	24.4	12.97	23.27	110.95	46.54
	5-methyl-2'-deoxycytidine	8.77	1.79	6.85	32	51.44	6.85	22.34	1	17.01	13.68	61.19
Pyrimidine Metabolism, Thymine containing	thymidine 5'-monophosphate	1	1.56	3.89	1.69	2.48	1	1.3	1	1	1	1.21
	thymidine	4.54	2.93	2.34	1.66	1.75	5.16	7.99	7.99	6.84	0.97	1.99
Purine and Pyrimidine Metabolism	methylphosphate	0.48	0.59	0.6	0.61	0.61	0.68	0.58	0.57	0.58	0.42	0.52
Dinucleotide	(3'-5')-adenylyluridine	7.87	2.12	4.23	2.12	1	1.86	1	1	1	1	1
	(3'-5')-adenylyladenosine*	3.47	1.81	3.59	2.06	1	1.72	1	1	1	1	1
	(3'-5')-cytidylylcytidine*	14.24	1.85	8.26	1	1	1	1	1	1	1	1
	(3'-5')-cytidylyluridine*	8.27	1	1.08	1	1	1	1	1	1	1	1
	(3'-5')-uridylylcytidine*	13.51	5.47	16.45	5.31	1.17	2.14	3.36	1	1	1	1
	(3'-5')-uridylyluridine	3.33	1.61	3.45	1.44	1	1	1	1	1	1	1
	(3'-5')-uridylyladenosine	2.21	1.72	4.45	2.84	1	1.13	1	1	1	1	1
Nicotinate and Nicotinamide Metabolism	nicotinate	1.94	1.94	1.94	1.61	1.51	1.6	1.81	1.84	2.37	2.34	1.59
	nicotinate ribonucleoside	1.29	0.1	0.11	0.27	0.68	1.04	1.13	1.18	0.3	0.28	1.34
	nicotinic acid mononucleotide (NaMN)	4.29	0.62	0.46	0.67	0.86	0.11	0.26	0.11	0.53	1.62	1.1
	nicotinamide	0.04	0.05	0.05	0.07	0.05	0.12	0.04	0.03	0.03	0.03	0.02
	nicotinamide ribonucleotide (NMN)	3.28	1.12	2.33	3.12	0.74	0.56	6.52	3.54	4.32	1.92	1.82
	nicotinamide riboside	7.14	1	1	5.8	1.58	1	13.78	17.32	7.91	6.25	7.15
	nicotinamide adenine dinucleotide (NAD+)	0.06	0.37	0.84	1.34	0.73	0.06	0.7	0.19	0.31	0.11	0.18
	trigonelline (N'-methylnicotinate)	0.97	0.99	0.99	0.97	0.98	0.9	0.95	0.93	0.95	0.95	0.89
Riboflavin Metabolism	riboflavin (Vitamin B2)	6.51	10.47	8.68	6.19	4.53	8.16	13.94	13.96	15.68	14.38	11.58
	flavin mononucleotide (FMN)	0.91	0.61	0.79	0.64	0.64	0.57	0.54	0.44	0.42	0.85	0.93
Pantothenate and CoA Metabolism	pantoate	17.26	2.91	2.19	1.93	1.99	2.72	7.34	3.72	4.17	5.58	4.33
	pantothenate	0.88	0.7	0.79	0.69	0.95	0.72	0.75	0.64	0.71	0.88	0.71
Ascorbate and Aldarate Metabolism	glucarate (saccharate)	1.05	0.53	0.74	0.28	0.2	1.06	0.78	0.64	0.47	0.51	0.4
	ascorbate (Vitamin C)	0.82	0.73	0.73	0.6	0.7	0.81	0.72	0.69	0.69	0.76	0.5
	threonate	0.87	0.99	1.16	1.07	1.12	0.93	1.01	1.03	1.03	1.13	1
	oxalate (ethanedioate)	0.42	0.94	0.87	0.99	0.93	0.78	0.83	0.82	0.78	0.92	0.91
	gulonate*	0.71	1.34	0.95	0.83	0.38	0.74	0.76	1.33	0.77	0.88	0.55
Tocopherol Metabolism	alpha-tocopherol	1.15	1.48	1.42	0.75	0.12	0.1	0.01	0.01	0.01	0.01	0.01
	delta-tocopherol	2.89	1.47	1.51	1.09	0.81	1.9	2.77	2.65	2.95	2.86	1.79
	alpha-tocotrienol	1.08	1.31	1.13	0.83	0.11	0.09	0.02	0.02	0.02	0.02	0.02
	gamma-tocotrienol	1.7	1.62	1.32	1.78	0.37	0.83	0.36	0.22	0.2	0.23	0.08
	gamma-tocopherol/beta-tocopherol	0.92	1.19	1.09	1.04	0.33	0.49	0.19	0.12	0.12	0.16	0.05
Pterin Metabolism	pterin	3.26	1.34	0.66	0.96	0.71	0.55	0.96	0.63	0.7	0.82	0.61
Hemoglobin and Porphyrin Metabolism	heme	0.06	0.09	0.09	0.07	0.04	0.09	0.03	0.03	0.03	0.03	0.03
Thiamine Metabolism	thiamin (Vitamin B1)	1.34	0.97	0.92	0.96	0.87	0.75	0.45	0.55	0.56	0.6	0.51
	hydroxymethylpyrimidine	0.75	0.25	0.29	0.83	0.98	0.8	0.14	0.48	0.26	0.2	0.34
Vitamin A Metabolism	carotene diol (1)	0.97	1.26	1.12	1.2	0.89	0.71	0.73	0.67	0.74	0.77	0.61
	carotene diol (2)	0.59	0.89	0.76	0.94	0.7	0.51	0.4	0.29	0.37	0.47	0.22
	carotene diol (3)	0.58	1.05	0.85	0.97	0.58	0.51	0.39	0.24	0.31	0.49	0.24
Vitamin B6 Metabolism	pyridoxine (Vitamin B6)	2.68	1.65	3.15	5.27	4.93	2.27	3.13	2.81	2.91	2.62	2.51
	pyridoxamine	1.52	1.19	1.12	1.08	0.53	0.81	2.55	1.97	2.18	2.4	1.79
	pyridoxamine phosphate	1.23	0.54	0.85	0.7	0.54	0.54	0.95	0.64	0.95	1.14	0.84
	pyridoxal	0.88	0.34	0.33	0.7	1.02	0.46	1.45	1.89	1.75	1.92	1.61
	pyridoxate	1.04	0.95	1.01	1.12	1.26	0.93	1.4	1.28	1.33	1.48	1.22
Benzoate Metabolism	benzoate	2.05	1.73	1.82	0.61	1.57	1.46	0.97	1.35	1.3	1	1.23
	4-hydroxybenzoate	1.83	1.29	1.33	1.57	1.62	1.34	2.6	2.11	2.42	2.42	2.59
	p-hydroxybenzaldehyde	0.17	0.73	0.71	0.77	0.71	0.44	0.16	0.23	0.23	0.2	0.18
	3-(4-hydroxyphenyl)propionate	3.14	4.5	3.09	2.74	2.99	1.41	4.52	2.44	4.7	7.07	3.84
Food Component/Plant	shikimate	0.31	0.64	0.98	0.95	0.92	0.87	1.38	1.35	1.53	1.79	1.63
	3-dehydroshikimate	28.18	39.51	6.04	3.88	8.12	3.77	72.61	68.78	71.8	111.43	66.36
	1,1-kestotetraose	0.9	13.64	32.57	12.45	3.96	1.68	1.01	0.9	0.9	0.9	1.36
	vanillate	0.52	0.93	0.98	1	0.81	1.07	1.87	1.64	1.78	1.98	1.47
	vanillin	0.45	0.53	0.64	0.73	1.14	0.51	0.16	0.28	0.33	0.35	0.29
	2,3-dihydroxyisovalerate	97.68	18.18	1.81	1.13	1.55	7.25	312.16	252.92	284.14	366.6	274.57
	2-isopropylmalate	283.34	101.13	17.42	2.42	1.53	13.9	224.25	154.73	179.47	247.52	174.14
	2-oxindole-3-acetate	0.97	1.05	0.95	0.9	0.82	0.72	0.83	0.83	0.88	1.12	0.81
	3-formylindole	0.86	9.01	5.39	2.56	2.33	1.14	4.84	4.35	4.77	5.69	4.14
	gluconate	3.88	16.27	0.21	0.17	0.07	1.54	0.51	3.41	0.38	0.37	0.54
	abscisate	0.78	0.82	0.92	0.87	0.83	0.7	0.94	0.78	0.88	1.04	0.81
	beta-guanidinopropanoate	0.91	1	1.01	0.98	0.95	0.72	0.8	0.82	0.99	1.08	0.83
	coumaroylquinate (2)	0.2	0.58	0.62	0.77	0.56	0.19	0.49	0.43	0.39	0.36	0.31
	coumaroylquinate (3)	0.85	0.91	0.99	0.94	0.88	0.69	0.92	0.81	0.9	0.8	0.77
	coumaroylquinate (4)	0.18	0.29	0.35	0.41	0.28	0.18	0.22	0.21	0.19	0.18	0.18
	coumaroylquinate (5)	0.32	0.51	0.48	0.71	0.33	0.19	0.41	0.42	0.26	0.24	0.21
	deoxymugineic acid	0.8	0.77	0.83	0.86	0.75	0.74	0.75	0.71	0.74	0.84	0.7
	dihydroferulate	11.28	22.68	11.96	4.09	1	1	9.07	2.06	16.28	31.62	1.36
	erythritol	2.02	1.18	1.25	2.31	2.52	0.86	1.72	1.27	1.54	2.89	2.06
	ferulate	0.72	3.93	4.24	2.38	0.23	3.78	1.52	2.07	2.74	2.75	0.77
	quinate	0.54	1.07	1.12	1	1.04	1.05	1.06	1.04	1.09	1.18	1.01
	feruloylquinate (1)	0.59	0.75	0.85	0.85	0.24	0.65	0.81	0.8	0.74	0.79	0.39
	feruloylquinate (3)	0.44	0.7	0.87	0.77	0.2	0.74	0.78	0.71	0.58	0.64	0.31
	feruloylquinate (4)	0.41	0.69	0.78	0.83	0.26	0.6	0.83	0.8	0.76	0.71	0.42
	feruloylquinate (5)	0.36	0.66	0.87	0.62	0.22	0.66	0.72	0.69	0.51	0.56	0.32
	galacturonate	51.88	20.64	20.97	12.61	29.77	14.16	69.78	74.2	77.63	71.98	80.16
	histidine betaine (hercynine)*	1.03	0.92	0.95	0.79	0.79	0.64	0.68	0.69	0.72	0.83	0.69
	homocitrate	8.1	2.35	2.15	2.03	2.09	4.52	10.22	7.65	8.31	11.97	8.06
	hydroquinone beta-D-glucopyranoside	0.7	4.2	5.56	0.65	0.57	4.75	4.08	5.85	5.75	1.64	1.53
	mannonate*	0.94	1.49	1.16	1.12	0.04	1.01	1.16	1.13	0.98	1.14	0.62
	naringenin	0.58	1.12	1.05	1.21	1.47	0.74	0.9	0.82	1.02	0.96	0.86
	nicotianamine	0.96	0.92	1.11	1.19	0.81	0.81	0.86	0.86	1.06	1.16	0.89
	pheophorbide A	0.46	1.06	0.97	1.18	0.93	0.62	0.71	0.67	0.75	0.81	0.65
	pheophytin A	0.74	1.13	1.07	0.93	0.69	0.52	0.43	0.4	0.43	0.31	0.43
	sinapate	1.67	0.64	1.16	0.33	0.26	0.27	0.81	0.38	0.51	0.45	0.26
	stachydrine	0.97	0.91	0.93	0.87	0.93	0.76	0.89	0.87	0.91	0.96	0.85
	syringic acid	0.35	0.91	1.03	0.88	0.08	0.85	1.39	1.19	1.34	1.52	0.34
	trihydroxybutane	5.93	0.66	0.64	0.92	0.43	0.67	51.26	43.25	49.2	45.97	35.24
	tyrosol	11.9	1.92	1.79	2.3	1.29	1.8	139.93	86.45	100.14	126.16	78.46
	ethyl alpha-glucopyranoside	164.89	10.01	6.67	3.43	2.72	24.07	764.28	1065.41	1131.48	1516.11	930.39
	methyl glucopyranoside (alpha + beta)	0.56	0.73	0.37	1.06	0.82	1.19	0.4	0.64	0.47	5.53	0.54
	feruloylputrescine	0.76	1.16	1.03	1.27	0.09	0.8	1.01	0.94	1.06	1.01	0.31
	2-ketogluconate	8.25	1.34	0.99	0.86	0.74	0.8	0.16	0.66	0.45	0.75	0.67
	4-hydroxycinnamate	0.11	1.33	1.48	1.35	1.33	1.39	0.45	0.65	0.68	0.64	0.42
	2-dimethylaminoethanol	2	1.73	1.29	1.85	1.59	1.24	1.39	1.17	1.3	1.39	1.33
	3-indoleglyoxylic acid	1.27	2.01	1.46	1.14	1.98	1.09	1.72	1.86	1.97	1.96	2.38
Bacterial/Fungal	3-deoxyoctulosonate	1.36	1.03	1.33	1.17	1.14	0.96	12.59	3.71	3.35	2.57	1.22
	N-methylpipecolate	0.91	0.9	0.84	0.86	0.99	0.81	0.79	0.77	0.91	0.86	0.8
Drug - Analgesics, Anesthetics	salicylate-glucoside	0.14	0.14	0.14	0.09	0.1	0.12	0.12	0.13	0.15	0.14	0.12
Drug - Topical Agents	salicylate	1.78	1.86	1.93	2.17	2	1.51	1.88	1.84	1.84	2.16	1.77
	2,6-dihydroxybenzoic acid	1.09	1.12	1.09	1.13	1.02	0.81	0.91	0.91	0.92	1.06	0.8
Drug - Other	S-carboxymethyl-L-cysteine	0.47	1.24	1.16	0.94	1.11	0.81	0.06	0.07	0.07	0.07	0.07
Chemical	sulfate*	0.68	0.62	0.74	0.5	0.67	0.78	0.31	0.39	0.35	0.28	0.3
	O-sulfo-L-tyrosine	1.19	0.79	0.8	0.8	0.77	0.88	0.97	0.9	0.74	0.72	0.96
	phenylglucopyranoside	1	4.46	6	1	1	6.77	1.9	5.51	3.99	1.09	1.1
	succinimide	0.95	1.03	0.94	1.2	0.87	1.3	1.28	1.17	1.42	3.13	1.86
	gentisic acid-5-glucoside	0.27	0.87	0.81	0.11	0.05	0.76	0.64	0.65	0.63	0.31	0.3
	thioproline	0.13	1.2	1.64	1.43	0.18	0.59	0.03	0.04	0.03	0.03	0.03
Partially Characterized Molecules	glutamine conjugate of C7H12O2*	0.58	0.73	0.81	1.08	0.98	0.53	0.61	0.48	0.86	0.9	0.66
	pentose acid*	1.22	1.15	1.2	1.11	1.03	1.01	1.1	0.94	1	1.17	0.97
